# Supplementary material for: Single-molecule localization microscopy and tracking with red-shifted states of conventional BODIPY conjugates in living cells
Source: PubMed Central journal article supplement (PMC6667493; doi:10.1038/s41467-019-11384-6), 2019-07-30
Supplement: 41467_2019_11384_MOESM1_ESM.pdf [file 41467_2019_11384_MOESM1_ESM.pdf]

## Supplementary Information

### Single-molecule localization microscopy and tracking with red-shifted states of conventional BODIPY conjugates in living cells

Santosh Adhikari<sup>1</sup>, Joe Moscatelli<sup>1</sup>, Elizabeth M. Smith<sup>1</sup>, Chiranjib Banerjee<sup>1</sup> and  
Elias M. Puchner<sup>1#</sup>

<sup>1</sup>School of Physics and Astronomy

University of Minnesota, Twin Cities

Physics and Nanotechnology (PAN)

115 Union Street SE, Minneapolis, MN 55455

# corresponding author, e-mail: [epuchner@umn.edu](mailto:epuchner@umn.edu)

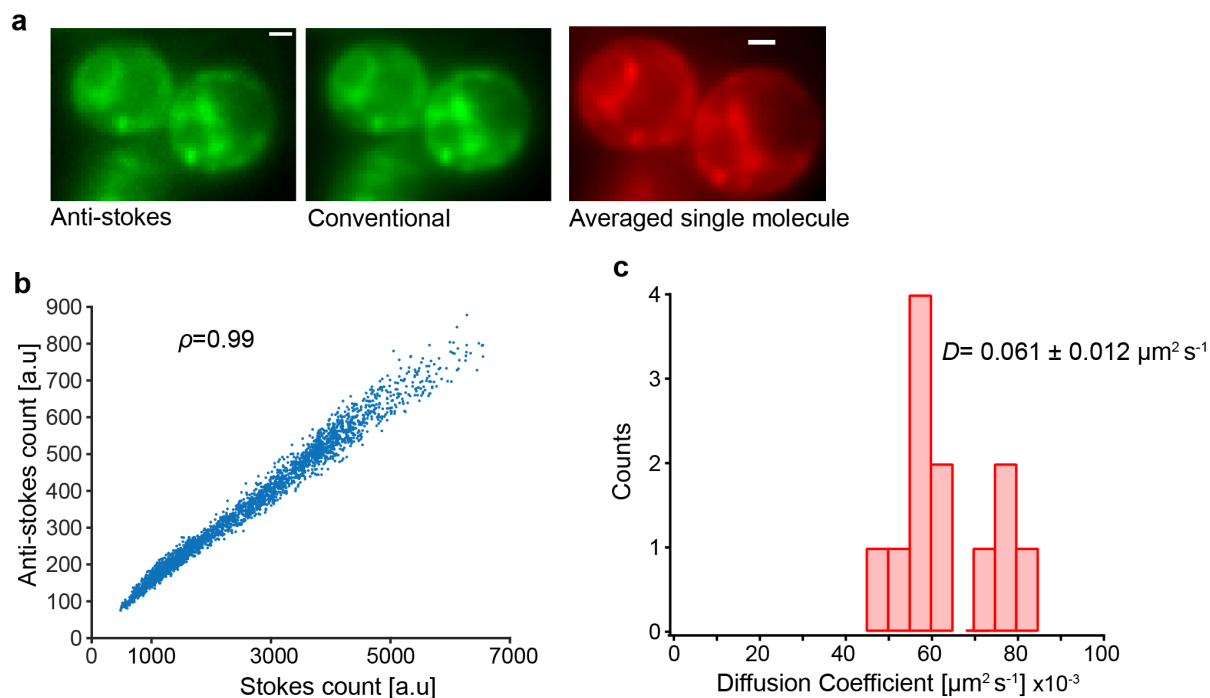

**Suppl. Fig.1| The co-localization of anti-stokes, conventional bulk fluorescence and single-molecule fluorescence images of BODIPY-C<sub>12</sub> and the distribution of diffusion coefficients of fatty acid analogs using single-molecule tracking of D<sub>||</sub> states of BODIPY-C<sub>12</sub>.** **a** (left) Anti-stokes fluorescence image of BODIPY-C<sub>12</sub> (ex. 561 nm, em. 525 nm) averaged over 200 frames. (center) Conventional fluorescence image (ex. 488 nm, em. 525 nm) averaged over 200 frames. (right) Single-molecule fluorescence (ex. 561 nm, em. 595 nm) image averaged over 800 frames. **b** The correlation of conventional and anti-stokes fluorescence images shows the same source of the signal (Person's  $\rho=0.99$ ,  $n= 4160$  points, 3 cells). **c** The distribution of diffusion coefficients has a mean of  $D= 0.061 \pm 0.012 \mu\text{m}^2/\text{s}$ . Each of the 12 diffusion coefficients was calculated from a different movie containing multiple cells ( $n>3$ ). For each diffusion coefficient, multiple traces ( $n>150$ ), each lasting at least three data acquisition frames, were used to calculate the MSD vs. time curve, which was fitted with a straight line. The error represents the standard deviation of diffusion coefficients.

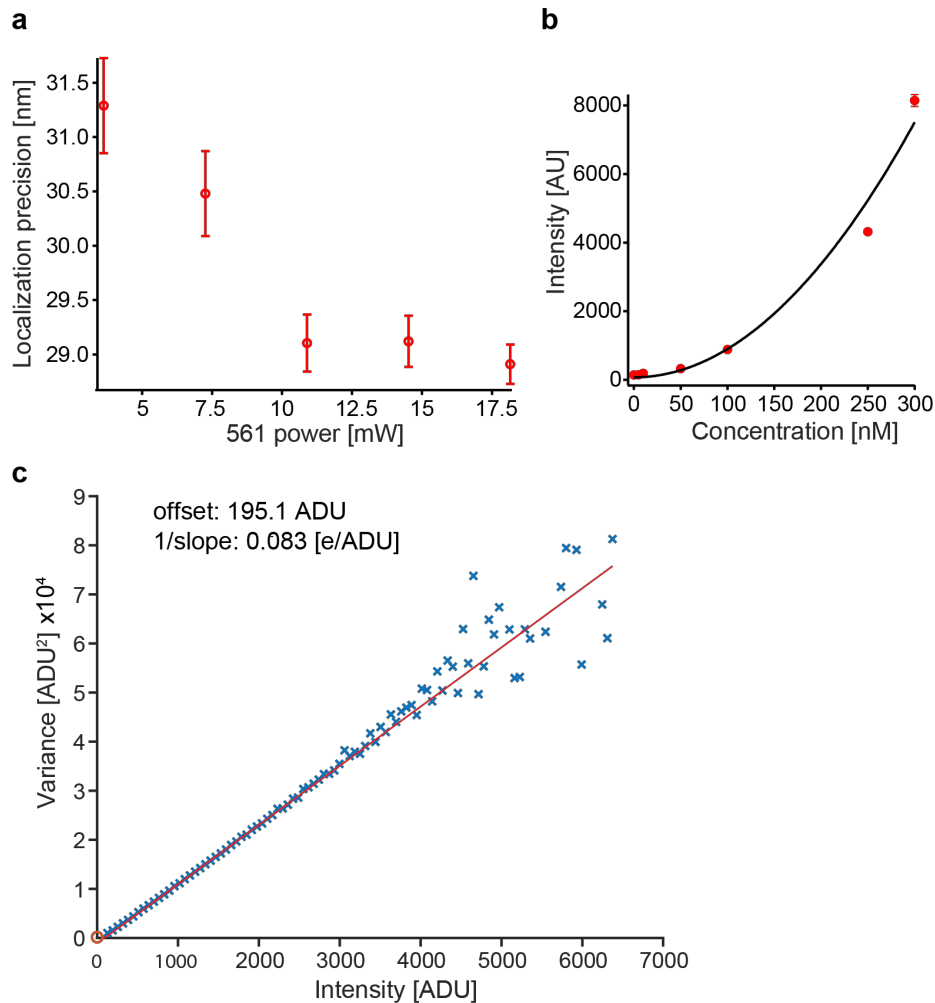

**Suppl. Fig. 2 | Characterization and optimization of BODIPY-C<sub>12</sub> for single-molecule imaging.** **a** Mean localization precision for different 561 nm excitation powers. Each data point contains more than 400 single-molecule localizations. Error bars represent the standard error of the mean localization precision. **b** The mean intensity of the fluorescent background of D<sub>||</sub>-BODIPY-C<sub>12</sub> (ex. 561 nm) averaged over 400 pixels and 500 frames. Error bars represent standard deviation in time. The quadratic dependence of background fluorescence on the concentration suggests dimerization mechanism for forming D<sub>||</sub>-states. **c** Mean intensity vs variance of camera pixels exposed to various intensities shows a linear behavior with an inverse slope of 0.083 e-/ADU. The extra noise Factor ( $F^2=2$ ) for EMCCD gain of 30 gives a conversion factor of 0.166 e-/ADU which is used for converting integrated counts to photons and is consistent with the manufacturers specification.

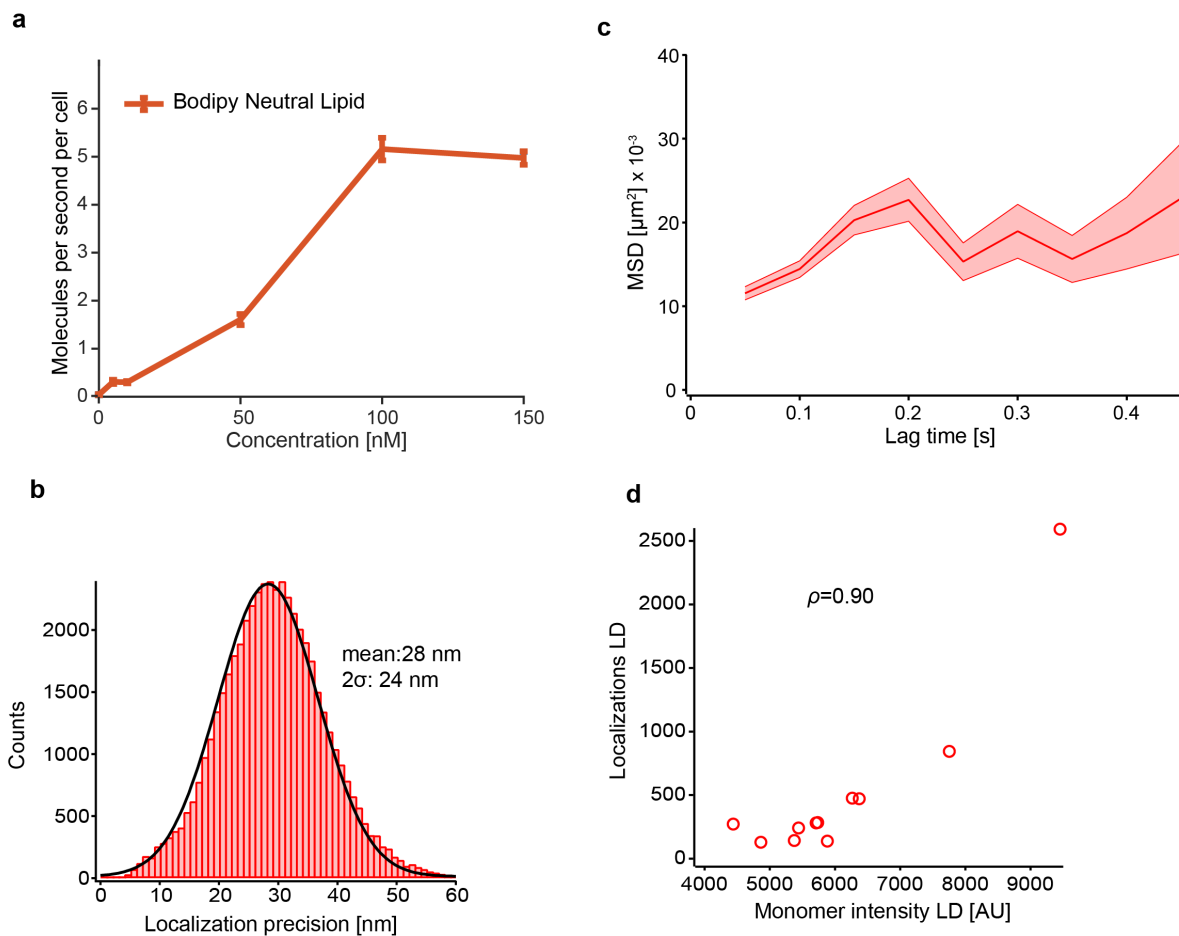

**Suppl. Fig. 3| Characterization of D<sub>II</sub>-states of BODIPY-NL and quantification of LDs.** **a** The rate of single-molecule detections is influenced by the BODIPY-NL concentration ( $n > 10$  cells, 5000 frames each). **b** The theoretical single-molecule localization precision calculated with the formula by Thompson et al. has a mean of 28 nm. **c** The single-molecule tracking of BODIPY-NL is used to compute MSD vs. time plot. The nature of the plot shows a confined diffusion of BODIPY-NL molecules inside the LDs ( $n = 208$  traces). Error band represents the standard error of the mean displacement. **d** The quantification of the monomer intensity and the number of localizations for individual LDs of different size shows a correlation indicating that the dimer population can be used for quantification.

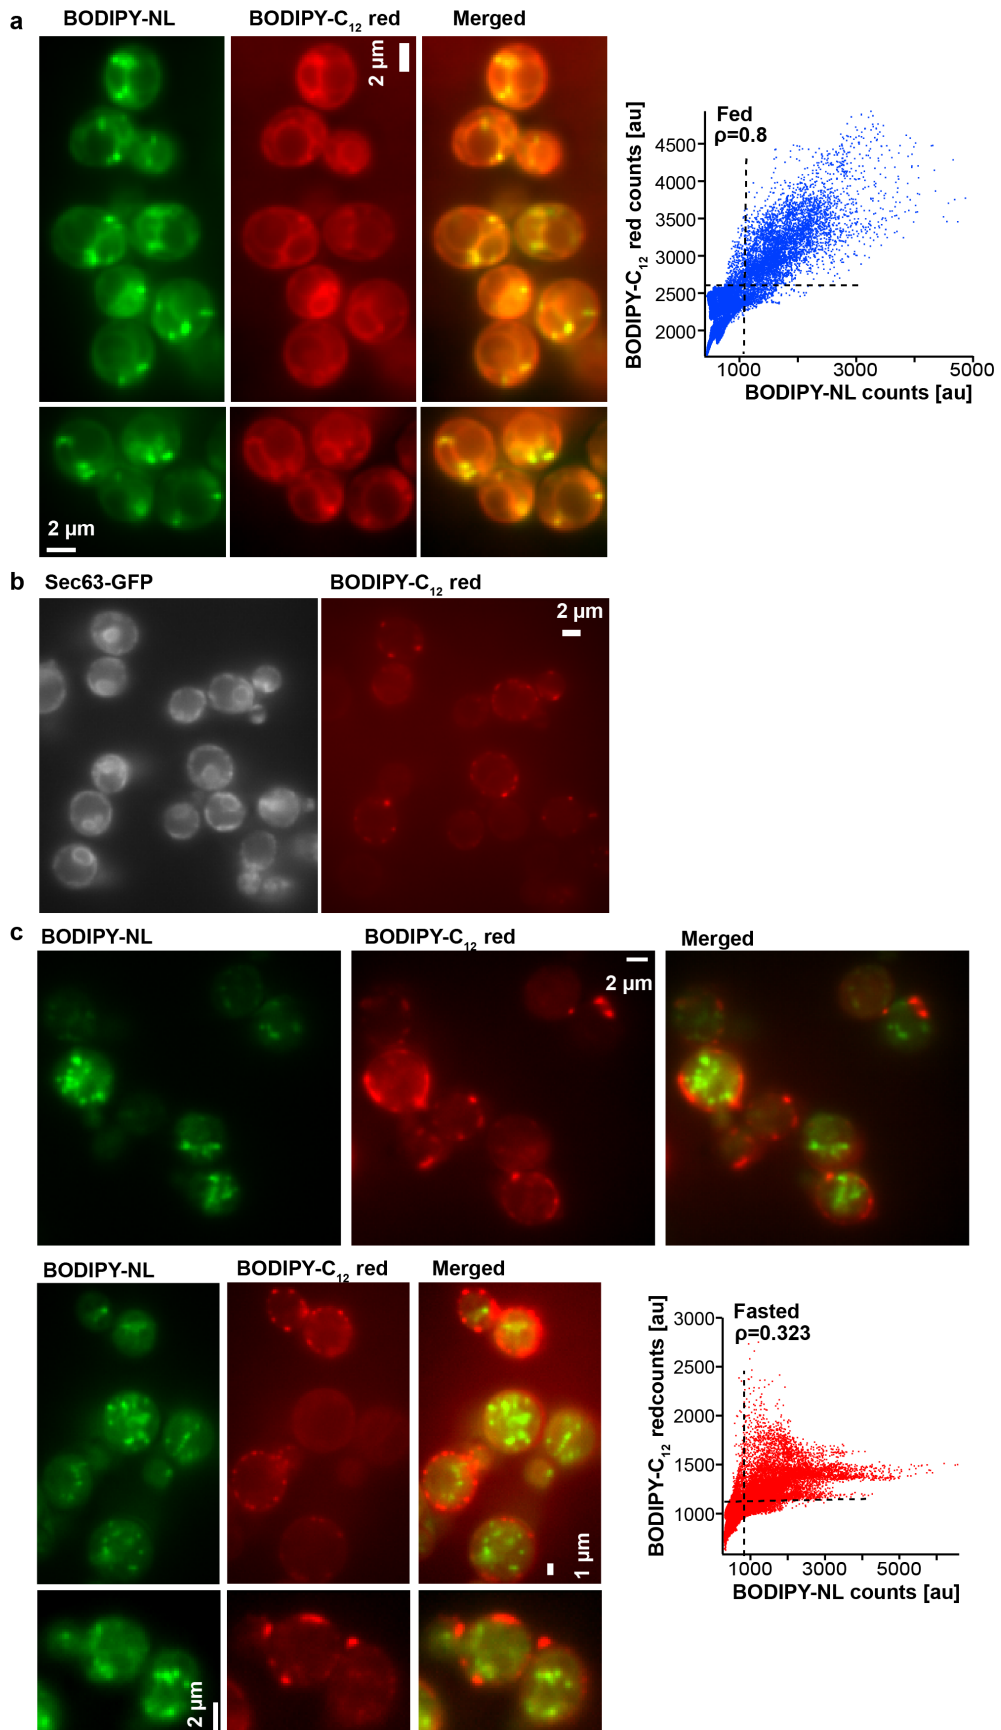

**Suppl. Fig. 4| Differential localization of fatty acid analogs under fed and fasted condition. a**

Conventional fluorescence images (average of 200 frames) of BODIPY-NL and BODIPY-C<sub>12</sub> red under fed condition. The distinct spots from BODIPY-NL co-localize (Pearson's  $\rho=0.8$ , 10 cells) with clusters of BODIPY-C<sub>12</sub> red along the ER indicating the incorporation of fatty acid analogs in LDs. **b** Conventional fluorescence images (average of 50 frames) of BODIPY-C<sub>12</sub> red and Sec63-GFP under fasted condition. The BODIPY-C<sub>12</sub> red shows distinct puncta around cell periphery. **c** The conventional fluorescence images of BODIPY-C<sub>12</sub> red and BODIPY-NL under fasted condition. The neutral lipid signal from LDs shows no co-localization (Pearson's  $\rho=0.3$ , 10 cells) with distinct puncta from BODIPY-C<sub>12</sub> red around the cell periphery.

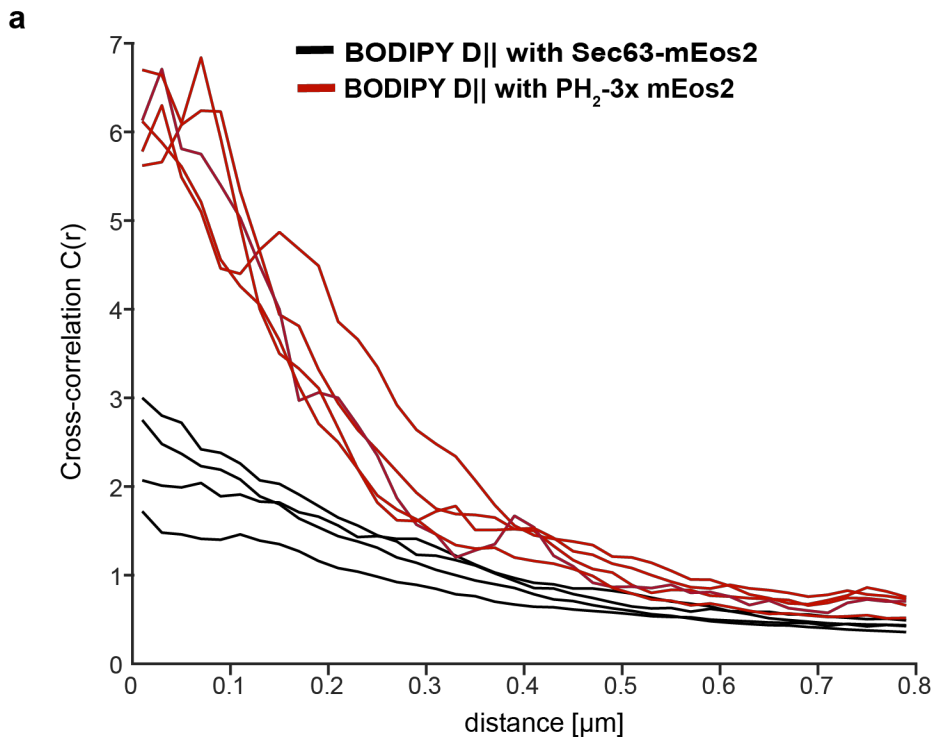

**Suppl. Fig. 5| D<sub>||</sub> state signal from BODIPY-C<sub>12</sub> red shows higher cross-correlation with PH<sub>2</sub>-3x**

**mEos2 compared to Sec63-mEos2. a** The cross-correlation of D<sub>||</sub>-BODIPY-C<sub>12</sub> red with Sec63-mEos2 (black) and with PH<sub>2</sub>-3x mEos2 (red). The correlation with PH<sub>2</sub>-3x mEos2 is stronger (~2 times) compared to Sec63-mEos2 at short distances (~20-80 nm). The different curves represent cross-correlations from different cells.

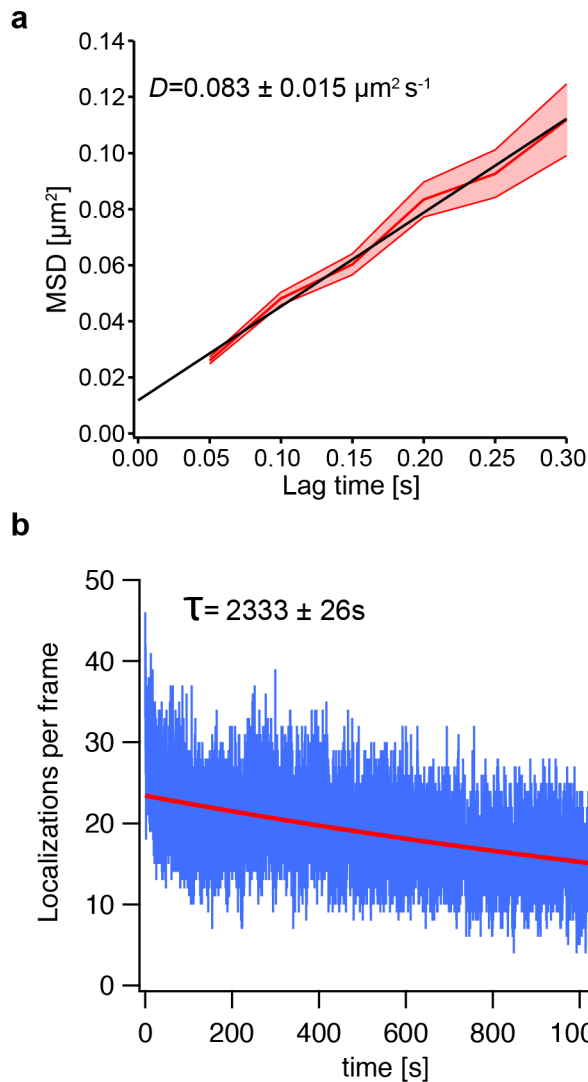

**Suppl. Fig. 6| Detection rate and tracking of  $D_{||}$ -BODIPY- $C_{12}$  states in U2OS cells. **a** The averaged MSD vs. time plot of single-molecule traces shows free diffusion of BODIPY- $C_{12}$  with a mean diffusion coefficient of  $D=0.083 \pm 0.015 \mu\text{m}^2/\text{s}$ . The diffusion coefficient was calculated from a linear fit (black line). The error band represents the standard error of the mean after averaging over 200 traces each lasting at least three acquisition frames (Error in diffusion coefficient: standard deviation from 6 different frame ranges each with minimum 150 traces from 1 cell). **b** The detection rate of single-molecules vs. data acquisition time shows that cells can be imaged for many minutes without a significant decrease in localizations.**
