# Supplementary material for: Single-molecule localization microscopy and tracking with red-shifted states of conventional BODIPY conjugates in living cells
Source: PubMed Central journal article supplement (PMC6667493; doi:10.1038/s41467-019-11384-6), 2019-07-30
Supplement: 41467_2019_11384_MOESM2_ESM.pdf [file 41467_2019_11384_MOESM2_ESM.pdf]

## **Description of Additional Supplementary Files**

File Name: Supplementary Movie 1

Description: Raw movie file of imaging single DII-BODIPY-C<sub>12</sub> states.

File Name: Supplementary Movie 2

Description: Conventional fluorescence movie of BODIPY-NL excited at 488 nm under fasting conditions. LDs are either tethered to the vacuole or exhibit fast diffusion inside the vacuole.
